# Supplementary material
Source: Springer Nature journal article supplement (https://www.springermedizin.de/resource/supplementary/13229_2013_105_MOESM12_ESM.pdf/9676270)
Supplement: MOESM12 [file 9676270]

## Discovery of candidate functional sequence variants

250K SNP microarray genotyping

386 family members from 26 extended and four 2-generation ASD families

Haplotype-sharing analysis

25 chromosomal regions identified

Custom sequence capture and Next-Gen DNA sequencing

25 chromosomal regions and additional regions/genes selected from literatures (total 1,800 genes)

DNA Sequence alignment and variant detection  
*In Silico* functional variant annotation

2,825 putative candidate functional sequence variants

Design custom microarray

Successful probe design for 2,799 variants=candidate variants.

Custom microarray manufacturing

Successful probe synthesis for 2,413 variants=candidate variants.

Array processing and analysis, case/control and discovery family samples

**Sample QC, 3000 cases,  
6000 controls**

**SNP QC**

Discard samples due to:  
•Poor DNA sample quality  
•Whole-chromosome abnormalities  
•Sample from duplicate enrollment  
•Samples from close relatives

Discard non-polymorphic variants (false positives)

Principal component analysis

•Recalculate and correct for principal components  
•Remove non-Caucasian samples to avoid errors due to population stratification

584 Sequence variants for association testing

Select single sample from multiplex families based on PCA

631 cases removed from multiplex families, 39 related controls removed

Final set of unrelated Caucasian samples: 1541 cases, 5785 controls.

**Association testing/Segregation Analysis**

**11 SNPs with OR>1.5 (Table 3), 28 SNPs seen only in discovery families (Table 4)**
